# Supplementary material for: Cardiovascular Risk Estimation Based on Country-of-Birth- and Country-of-Residence-Specific Scores among Migrants in the Netherlands: The HELIUS Study
Source: MDPI journal article supplement (doi:10.3390/ijerph20065148), 2023-03-15
Supplement: s1 [file s1]

**Supplementary File:****Table S1: The 90<sup>th</sup> percentile of risk scores among a multi-ethnic population living in the Netherlands using the laboratory to based CVD risk Scores**

| <b>Parameter</b>                  | <b>Framingham</b> | <b>Globorisk</b> | <b>PCE II</b> | <b>SCORE II</b> | <b>WHO II</b> |
|-----------------------------------|-------------------|------------------|---------------|-----------------|---------------|
| <b>Total</b>                      | 1738(9.65)        | 1333(6.71)       | 1453(17.31)   | 1339(6.72)      | 1910(9.65)    |
| <b>Gender</b>                     |                   |                  |               |                 |               |
| <b>Male</b>                       | 1416(18.34)       | 864(10.17)       | 402(3.57)     | 1136(13.34)     | 1513(17.86)   |
| <b>Female</b>                     | 322(3.13)         | 469(4.12)        | 1855(9.44)    | 203(1.78)       | 397(3.50)     |
| <b>p value</b>                    | <0.0001           | <0.0001          | <0.0001       | <0.0001         | <0.0001       |
| <b>Ethnicity</b>                  |                   |                  |               |                 |               |
| <b>Dutch</b>                      | 344(9.12)         | 247(5.84)        | 354(8.36)     | 433(10.22)      | 514(12.17)    |
| <b>Ghanaian</b>                   | 111(5.48)         | 92(4.36)         | 195(9.15)     | 64(3.00)        | 135(6.41)     |
| <b>Moroccan</b>                   | 164(5.63)         | 124(3.72)        | 158(4.73)     | 103(3.08)       | 161(4.85)     |
| <b>South Asian<br/>Surinamese</b> | 423(15.66)        | 327(11.02)       | 404(13.58)    | 251(8.44)       | 387(13.11)    |
| <b>African<br/>Surinamese</b>     | 465(12.92)        | 378(9.79)        | 564(14.56)    | 375(9.68)       | 518(13.49)    |
| <b>Turkish</b>                    | 200(7.30)         | 143(4.63)        | 180(5.83)     | 87(2.82)        | 161(5.25)     |
| <b>p value</b>                    | <0.0001           | <0.0001          | <0.0001       | <0.0001         | <0.0001       |

Data are presented as the frequency with corresponding proportions in parenthesis. p is significant at 0.05 comparing the male and female 10 to year risk of cardiovascular disease.

**Table S2: The 90<sup>th</sup> percentile of risk scores among a multi-ethnic population living in the Netherlands using Nonlaboratory based CVD risk Scores**

| <b>Parameter</b>                  | <b>Framingham</b> | <b>Globorisk</b> | <b>WHO II</b> |
|-----------------------------------|-------------------|------------------|---------------|
| <b>Total</b>                      | 2311(12.69)       | 1458(7.28)       | 1809(9.02)    |
| <b>Gender</b>                     |                   |                  |               |
| <b>Male</b>                       | 1797(23.03)       | 1084(12.67)      | 1387(16.21)   |
| <b>Female</b>                     | 514(4.94)         | 374(3.26)        | 422(3.67)     |
| <b>p-value</b>                    | <0.0001           | <0.0001          | <0.0001       |
| <b>Ethnicity</b>                  |                   |                  |               |
| <b>Dutch</b>                      | 449(11.84)        | 378(8.89)        | 496(11.66)    |
| <b>Ghanaian</b>                   | 220(10.71)        | 110(5.13)        | 110(5.13)     |
| <b>Moroccan</b>                   | 230(7.83)         | 107(3.19)        | 146(4.35)     |
| <b>South Asian<br/>Surinamese</b> | 472(17.35)        | 252(8.45)        | 312(10.46)    |
| <b>African Surinamese</b>         | 656(17.97)        | 455(11.65)       | 553(14.14)    |
| <b>Turkish</b>                    | 245(8.81)         | 131(4.21)        | 158(5.08)     |
| <b>p-value</b>                    | <0.0001           | <0.0001          | <0.0001       |

Data are presented as the frequency with corresponding proportions in parenthesis. p is significant at 0.05 comparing the male and female 10-year risk of cardiovascular disease.

**Table S3: Agreement in cardiovascular risk classification between risk scores among a multi-ethnic population living in the Netherlands using the 90<sup>th</sup> percentile**

| Parameter     | Globorisk | PCE II   | SCORE II | WHO II   | Framingham NL | Globorisk NL | WHO II NL |
|---------------|-----------|----------|----------|----------|---------------|--------------|-----------|
| Framingham    | 0.635***  | 0.775*** | 0.599*** | 0.709*** | 0.582***      | 0.582**      | 0.632***  |
| Globorisk     |           | 0.685*** | 0.518*** | 0.740*** | 0.627***      | 0.563***     | 0.561***  |
| PCE II        |           |          | 0.571*** | 0.734*** | 0.788***      | 0.602***     | 0.641***  |
| SCORE II      |           |          |          | 0.686*** | 0.572***      | 0.734*       | 0.778***  |
| WHO II        |           |          |          |          | 0.722***      | 0.637***     | 0.714***  |
| Framingham NL |           |          |          |          |               | 0.599***     | 0.677***  |
| Globorisk NL  |           |          |          |          |               |              | 0.825***  |

Data is presented as kappa coefficients of agreement where 0 to 0.2 None, 0.21 to 0.39 minimal, 0.4 to 0.57 weak, 0.6 to 0.79 moderate, 0.8 to 0.90 strong, > 0.9 almost perfect. P is significant at 0.05\*, 0.01\*\*, 0.001\*\*\*. NL: Non to laboratory base score.

**Table S4: The 90<sup>th</sup> percentile of risk for the Netherlands specific risk algorithm and country of birth specific algorithm among a multi-ethnic population living in the Netherlands**

| Parameter                     | Globorisk | SCORE II  | WHO II    | WHO II NL | Globorisk NL |
|-------------------------------|-----------|-----------|-----------|-----------|--------------|
| <b>Ghanaian</b>               |           |           |           |           |              |
| Netherlands                   | 178(8.49) | 64(3.00)  | 191(9.12) | 188(8.76) | 110(3.13)    |
| Country of birth              | 190(9.01) |           | 167(7.93) | 145(6.76) | 194(9.05)    |
| <b>Moroccans</b>              |           |           |           |           |              |
| Netherlands                   | 110(5.13) | 271(8.07) | 289(8.78) | 280(8.35) | 306(9.13)    |
| Country of birth              | 194(9.05) | 312(9.34) | 316(9.49) | 291(8.68) | 319(9.52)    |
| <b>South Asian Surinamese</b> |           |           |           |           |              |
| Netherlands                   | 193(6.50) | 251(8.44) | 256(8.71) | 260(8.71) | 252(8.45)    |
| Country of birth              | 256(8.63) |           | 268(9.07) | 284(9.52) | 236(7.91)    |
| <b>African Surinamese</b>     |           |           |           |           |              |
| Netherlands                   | 378(9.79) | 375(9.68) | 341(8.91) | 366(9.36) | 227(5.81)    |
| Country of birth              | 338(8.75) |           | 333(8.66) | 353(9.03) | 376(9.63)    |
| <b>Turkish</b>                |           |           |           |           |              |
| Netherlands                   | 241(7.81) | 299(8.87) | 271(8.87) | 260(8.36) | 131(4.21)    |
| Country of birth              | 246(7.97) | 241(7.80) | 303(9.86) | 277(8.91) | 222(7.14)    |

Data are presented as the frequency with corresponding proportions in parenthesis. NL: Non to laboratory base score.

**Table S5: Agreement in cardiovascular risk classification among the Netherlands-specific risk scores and the country of birth risk score using the 90<sup>th</sup> percentile.**

| Parameter                     | Globorisk | WHO II   | SCORE II | Globorisk NL | WHO II NL |
|-------------------------------|-----------|----------|----------|--------------|-----------|
| <b>Ghanaian</b>               | 0.748***  | 0.798*** | N/A      | 0.669***     | 0.776***  |
| <b>Moroccan</b>               | 0.669***  | 0.809*** | 0.833*** | 0.652***     | 0.780***  |
| <b>South Asian Surinamese</b> | 0.771***  | 0.885*** | N/A      | 0.888***     | 0.822***  |
| <b>African Surinamese</b>     | 0.772***  | 0.869*** | N/A      | 0.726***     | 0.858***  |
| <b>Turkish</b>                | 0.735***  | 0.804*** | 0.805*** | 0.680***     | 0.778***  |

Data is presented as kappa coefficients of agreement where 0 to 0.2 None, 0.21 to 0.39 minimal, 0.4 to 0.57 weak, 0.6 to 0.79 moderate, 0.8 to 0.90 strong, > 0.9 almost perfect agreement. P is significant at 0.05\*, 0.01\*\*, 0.001\*\*\*. NL: Non to laboratory base score.
